# Supplementary material for: Independent specialisation of myosin II paralogues in muscle vs. non-muscle functions during early animal evolution: a ctenophore perspective
Source: PubMed Central journal article supplement (PMC3502136; doi:10.1186/1471-2148-12-107), 2012-07-02
Supplement: 1471-2148-12-107-S1.pdf [file 1471-2148-12-107-S1.pdf]

10 20 30 40 50 60 70 80 90 100  
Mmu\_MyoX\_gi130507685refNP\_0623 .....MDS.....FFPEGARVWL---  
Mmu\_VIIa\_gi115511010refNP\_0326 .....MVLQKGDYVWMDLKS  
Mmu\_VIIb\_gi261823963refNP\_1157 .....FRLGDHVLWDP-P  
Ddi\_0301\_gi166240253refXP\_0017 .....MMIDNNC.....GKKEVWV---P  
Ddi\_1951\_gi66823681refXP\_64519 .....MTTSTIENGASSPIIIVSSSTP.....KLYQEGAGVWI---P  
Sce\_9711\_gi6324902refNP\_014971 .....MSFVGTRCWY---P  
Sce\_9373\_gi6319290refNP\_009373 .....MSFVGTRCWY---P  
Mmu\_MyoVc\_gi124486759refNP\_001 .....MAVAEL.....YAQYNRVWI---P  
Mmu\_MyoVa\_gi115511052refNP\_034 .....MAASE.....LYTKFARVWI---P  
Mmu\_MyoVb\_gi46399202refNP\_9638 .....MSYSE.....LYTRYTRVWI---P  
Ddimyo .....MNPIDHRTSDYHKYLKVKQGDSDLFLKLTVS.....DKRYIWNDDP  
Sce\_1888\_gi6321812refNP\_011888 .....MTGGQC.....SSNMIWVI---P  
Sar\_1270\_SARC\_01270T0Sphaerofo .....MSDSLKHLRDTSEAKGGFADSAD.....QSEWTAQKWIWV---K  
Mbr\_4119\_nullMonosigabrevicoll .....MSVLQHLR.....VQRSSDDVK.....SWAALKRVWV---P  
Sro\_4749\_PTSG\_04749T0Salpingoe .....MTDQVLKYLRIIPASSRQGYEDSSA.....WAAKRLAWI---P  
PpiMHCa .....MSDAALKYL.....VAERSLALNAIS.....QAEWAEKLVWV---P  
Agu\_8281\_gi340368578refXP\_0033 .....MATEDLKYL.....VD-RGKMYDAIA.....QAEWAKKLVWV---P  
Cow\_3939\_CAOG\_03939T0Capsaspor .....MSHKEEDAMAYLS.....VGKKNVDVAAV.....QAEWAAKKMWI---P  
TaMHCa .....MKSSAKELKHLVVEKRAFIDPAV.....QAQWMAKKYVWI---P  
Asumyo .....MANNATSEISYLQ.....VQ-KGIVADPAL.....QAEWAKQLVWV---P  
Hma\_21673571\_gi221130996refXP .....MGLNFLNDCLI.....  
Nve\_JG15820\_jgiNemvel118073jgi .....MENEMKYL.....VD-RAAISDPVA.....LAEWSKRLVWI---P  
Mmu\_Myo14\_gi29336026refNP\_0822 .....MAAVTMSVSGRKVARSRGPVPEAAQSFLYAPRTNIVGGGGPQVEWTARRMWV---P  
MmsmMHC11 .....MAQQKQLSDEKFL.....FVDKNFMSFMA.....QADWVAKLVWV---P  
Mmu\_Myo9\_gi114326446refNP\_0718 .....MAQQAADKYL.....YVDKNFINNPLA.....QADWAAKLVWV---P  
MmuMHC10 .....MAQRTGLBDEPERYL.....FVDRAVIYNPAT.....QADWAKKLVWV---P  
Lpenm .....MAAPEDQFAGMSAQELKYLTVDRNILTDPASA.....QSQWAARRMWV---P  
LgnmMHCII1 .....MAEDHLVGLSAQELRYLTVDRSLVNDPSV.....QAEWAGKRLIWI---P  
Aaesmm .....MADDLDRNDPELKYL.....SVERNSFNDPAT.....QAEWTQKRLVWV---P  
Dme\_zipper\_gi62471805refNP\_001 MKSAWLALKSKSALHPKSEYYPVSNIHYPKAAVYRQTRNYLEIAAKMSEEVDRNDPELKYL.....SVERNQFNDPAT.....QAEWTQKRLVWV---P  
PpiMHCb1 .....  
PpiMHCb2 .....  
Mmu\_Myo15\_gi261245016refNP\_001 .....MDLSEFGDATAFLR.....RNKADPLFPQPA.....FDGKKCWV---P  
Mmu\_Myo7B\_gi145864471refNP\_001 .....MMDMSLGEACYL.....QYQEMMKVHTV.....FWDCKKRVWV---P  
MmcMHC7 .....MADAEMAAGFAAAPPFLR.....KSEKERLEAQR.....PFDLKKDFV---P  
Mmu\_Myo6\_gi6754774refNP\_034986 .....MTDAQMADFGAAQYLR.....KSEKERLEAQR.....PFDIRTECFV---P  
Mmu\_Myo13\_gi124486959refNP\_001 .....MSSDAEMAFGEAAPPYLR.....KPEKERIEAQN.....PFDKAKCPA---V  
Mmu\_Myo3\_gi153792649refNP\_0010 .....MSSDTEMEVFGIAAPPFLR.....KSEKERIEAQN.....PFDAKTYCFV---V  
MmsmMHC8 .....MSAGSDAEMAFGEAAPPYLR.....KSEKERIEAQN.....PFDAKTSVFV---A  
Mmu\_Myo2\_gi205830428refNP\_0010 .....MSSDAEMAFGEAAPPYLR.....KSEKERIEAQN.....PFDAKTSVFV---A  
Mmu\_Myo4\_gi67189167refNP\_03498 .....MSSDAEMAFGEAAPPYLR.....KSEKERIEAQN.....PFDAKTSVFV---A  
Mmu\_Myo1\_gi82524274refNP\_10960 .....MSSDAEMAFGEAAPPYLR.....KSEKERIEAQN.....PFDAKTSVFV---V  
Hma\_21579261\_gi221113859refXP\_ .....MSHDPMLDPLRLRYLR.....VDPVALRDSK.....SFDAKKRWV---P  
Asumyo4 .....MDYENDPGWQYLR.....QSRQMIADQSK.....FYDSKKDCWI---P  
AqMHCIIb .....MSGTEDEPVSYL.....PTASRTVYDQIK.....AFDSKKWVWL---P  
Aaesmmmy .....MPKPVVQGGDDPPSEWLFISEMKRIDQSK.....PYDAKCAW---P  
DmeMHCC .....MPKPVANQDEDDPTPYLF.....VSLQRRIIDQSK.....PYDSKKS CWI---P  
Lpemyosin .....MTMDFSDPMEFLC.....LTRQKLMETS I.....PFDGKKN CWI---P  
LgMHCII3 .....MAGSYDPNDPMKYL.....VDRKKLMEBQTK.....AFDGKCAW---P  
TaMHCb .....MDDAEGFLR.....QKSQAVTE.....SIDSKKWVWI---E  
Nve\_SBI .....DKSQIMAQAK.....EFSEKKWVWI---P

110 120 130 140 150 160 170 180 190 200  
Mmu\_MyoX\_gi130507685refNP\_0623 .....RENGQHFPSTV.....NSC-AGEVVVQ.....T-DIGQVF-TY.....KQSTITNQKVTAHPLHHEGVDDMASLAEHLGGSIMVNLFRQY-KRNQ  
Mmu\_VIIa\_gi115511010refNP\_0326 .....GQEFVDPVIGAVV.....KLC-DSGQYQVV.....D-DEGNH-HI.....SPQN-ATHIKMHPSTVHGVEDMIRLGGDLNAGILNLLIRY-RDHL  
Mmu\_VIIb\_gi261823963refNP\_1157 .....SSSKTGVVAIGGI.....VKETKLGKTLIE.....D-DEGNH-WI.....HAD-LSTLRPMHPNSAQVDDMIRLGGDLNAGVHNLLIRY-QQHK  
Ddi\_0301\_gi166240253refXP\_0017 .....NPKEGWINGLD.....IKETIPGEGWLVR.....D-ENGEKI-KI.....EKDE-LRMQNPVTEGQIDDMTSLSHLHEAAVHNLLIRY-EINS  
Ddi\_1951\_gi66823681refXP\_64519 .....DQELGWIGADVIEHSSETSDQVILVR.....T-ENGRER-KI.....PLSK-VFQKNPDLLEGVDDLSFSLHHEPALLHNLLIRY-NLQ  
Sce\_9711\_gi6324902refNP\_014971 .....HKELGWIGAEVTE-KNEFNDGKPHLE.....LQLEDETEV-SVDTKDLNNDK-DQSLPPLRNPPILEATEDLTSLSYLNHEPAVLHAIKQRY-SQL  
Sce\_9373\_gi6319290refNP\_009373 .....HKEQGWIGGEVTE-KNDFEETPHLE.....LQLEDETEV-SIETNSFENDDHPFLVLRNPPILESTDDLTLSYLNHEPAVLHAIKQRY-MNQ  
Mmu\_MyoVc\_gi124486759refNP\_001 .....DPEVWVKSAL.....AKDYRAGDRLVR.....LLELDGMBL-EY.....PVDP-GSLPPLRNPDLVGENDLTALSYLHEPAVLHNLIRVFAESDKL  
Mmu\_MyoVa\_gi115511052refNP\_034 .....DPEVWVKSAL.....LKDYPKQDKVLL.....LLELDGMBL-EY.....RLDPTKGBLPHLRNPDLLVGENDLTALSYLHEPAVLHNLIRVFAESDKL  
Mmu\_MyoVb\_gi46399202refNP\_9638 .....DPEVWVKSAL.....TKDYKEDSKSL.....LRLLEDTEV-EY.....FVDPVQNPVPLRNPDLVGENDLTALSYLHEPAVLHNLIRVFAESDKL  
Ddimyo .....KERDSYKCEI.....VSE-TSDSPTFK.....T-TVDGQR-QV.....KIDD-ANQRNPKIFDQVEDMSLSEYLNHEPAVLHNLIRY-NQD  
Sce\_1888\_gi6321812refNP\_011888 .....DEKEVYKGEML-STDINKNKPTQEEQIGIVHPLDSTEVSNLQV.....RISD-VFPVNPSTFDKVENMSELTHLNHEPAVLHNLIRY-DCL  
Sar\_1270\_SARC\_01270T0Sphaerofo .....DEADTFIAGNI.....TED-KGETYSVR.....L-TNGKV-EI.....NKND-SYKMNPPKFEKVEDMADLTLNHEPAVLHNLIRY-QSNL  
Mbr\_4119\_nullMonosigabrevicoll .....DETGGYVAETI.....RSD-SGDSITCE.....RV-SDHQTV-TI.....PKDD-TQMNPPKFKVVEDMADLTLNHEPAVLHNLIRY-MADL  
Sro\_4749\_PTSG\_04749T0Salpingoe .....HTKEGFVLTAL.....KSD-EGEVEVTCQ.....R-EDTRMVTV.....SADD-VQKANPPKFKVVEDMADLTLNHEPAVLHNLIRY-HADL  
PpiMHCa .....DTEHGFVGRK.....VED-NGDEITLV.....SADD-VQKANPPKFEKVEDMADLTLNHEPAVLHNLIRY-HSDL  
Agu\_8281\_gi340368578refXP\_0033 .....HPEAGFVAGSI.....KKE-EGDSTVTE.....M-TDQKQ-TV.....SKDD-IQKMNPPKFEKVEDMADLTLNHEPAVLHNLIRY-YSQL  
Cow\_3939\_CAOG\_03939T0Capsaspor .....DDNEGFVAASL.....KSE-TDKDATVE.....V-AGGKTL-TV.....KRDD-VHKANPPKFEKVEDMADLTLNHEPAVLHNLIRY-FSNM  
TaMHCa .....DDNHGFVAASI.....KSE-RGDDEATV.....L-LNDRGT-TI.....NRDD-IQKMNPPKFEKVEDMADLTLNHEPAVLHNLIRY-FSGL  
Asumyo .....HETQGFVAASL.....KED-RGDDEATV.....LA-ETGKRL-TV.....SKDD-VQKANPPKFEKVEDMADLTLNHEPAVLHNLIRY-FSSL  
Hma\_21673571\_gi221130996refXP .....LKI-KFD-LAKKVNFG.....V-VTSNFV.....ARKARKVLFDEVDRIAIKASILNHEPAVLHNLIRY-FSDL  
Nve\_JG15820\_jgiNemvel118073jgi .....DEKQGFVAGSI.....KDE-SKDEVVVE.....V-EGGKK-KV.....HKDD-IQKMNPPKFEKVEDMADLTLNHEPAVLHNLIRY-YSQL  
Mmu\_Myo14\_gi29336026refNP\_0822 .....SELHGFVAASL.....RDE-GEDEAVVE.....LA-ESGRRL-RL.....PRDQ-IQKMNPPKFKVVEDMADLTLNHEPAVLHNLIRY-YSQL  
MmsmMHC11 .....SEKQGFVAASI.....KKE-KGDEVVVE.....LV-ENGKVV-TV.....GKDD-IQKMNPPKFKVVEDMADLTLNHEPAVLHNLIRY-FSGL  
Mmu\_Myo9\_gi114326446refNP\_0718 .....SSKNGFEPASL.....KEE-VGEAIVE.....LV-ENGKVV-TV.....NKDD-IQKMNPPKFKVVEDMADLTLNHEPAVLHNLIRY-YSQL  
MmuMHC10 .....SERHGFVAASI.....KKE-RGDEVMVE.....LA-ENGKKA-MV.....NKDD-IQKMNPPKFKVVEDMADLTLNHEPAVLHNLIRY-YSQL  
Lpenm .....SETHGFVIGASV.....KEE-KGDEVVVD.....VE-DTGKRT-TF.....HRDD-IQKMNPPKFKVVEDMADLTLNHEPAVLHNLIRY-YSQL  
LgnmMHCII1 .....DEQNGFVMAIS.....KGE-RGDQLEVI.....VD-ETGQKR-TV.....HRDD-IQKMNPPKFKVVEDMADLTLNHEPAVLHNLIRY-YSQL  
Aaesmm .....HETQGFVAASI.....KGE-RGDEVEVE.....LA-ETGKRV-LV.....LKDD-IQKMNPPKFEKVEDMADLTLNHEPAVLHNLIRY-YSQL  
Dme\_zipper\_gi62471805refNP\_001 .....HENQGFVAASI.....KRE-HGDEVEVE.....LA-ETGKRV-MI.....LRDD-IQKMNPPKFEKVEDMADLTLNHEPAVLHNLIRY-YSQL  
PpiMHCb1 .....  
PpiMHCb2 .....  
Mmu\_Myo15\_gi261245016refNP\_001 .....DGKNAYIEAEV.....KESGDDQVIVE.....T-RDGEIM-RI.....KEDK-LQKMNPELEMIEDLSMLLYLNHEPAVLHNLIRY-DHWM  
Mmu\_Myo7B\_gi145864471refNP\_001 .....DEQDAYVEAEV.....KTEATGGKVTVE.....T-KDQKVL-TV.....RETE-MQPMNPPKFDLLEDMAAMTHLNHEPAVLHNLIRY-ARWM  
MmcMHC7 .....DDKEEFVAKAI.....VSR-EGGKVTAE.....T-ENKIV-TV.....KEDQ-VMQNPPKFDKIEDMAAMTLHHEPAVLHNLIRY-ASWM  
Mmu\_Myo6\_gi6754774refNP\_034986 .....DDKEEFVAKAI.....VSR-EGGKVTAE.....T-ENKIV-TV.....KEDQ-VMQNPPKFDKIEDMAAMTLHHEPAVLHNLIRY-ASWM  
Mmu\_Myo13\_gi124486959refNP\_001 .....DDKEEFVAKAI.....VSR-EGGKVTAE.....T-ENKIV-TV.....KEDQ-VMQNPPKFDKIEDMAAMTLHHEPAVLHNLIRY-ASWM  
Mmu\_Myo3\_gi153792649refNP\_0010 .....DDKEEFVAKAI.....VSR-EGGKVTAE.....T-ENKIV-TV.....KEDQ-VMQNPPKFDKIEDMAAMTLHHEPAVLHNLIRY-ASWM  
MmsmMHC8 .....EPKESYVKSVI.....QSK-DGGKVTIV.....T-EGATL-TV.....KEDQ-VFPNPPKVDKIEDMAAMTHLHEPGLVNLKRY-AAWM  
Mmu\_Myo2\_gi205830428refNP\_0010 .....EPKESYVKSVI.....QSK-DGGKVTIV.....T-EGATL-TV.....KEDQ-VFPNPPKVDKIEDMAAMTHLHEPGLVNLKRY-AAWM  
Mmu\_Myo4\_gi67189167refNP\_03498 .....DAKESYVKTIV.....QSR-EGGKVTAK.....T-EGGATV-TV.....KDDQ-VFPNPPKVDKIEDMAAMTHLHEPAVLHNLIRY-AAWM  
Mmu\_Myo1\_gi82524274refNP\_10960 .....DAKESYVKTIV.....QSR-EGGKVTAK.....T-EGGATV-TV.....KDDQ-VFPNPPKVDKIEDMAAMTHLHEPAVLHNLIRY-AAWM  
Hma\_21579261\_gi221113859refXP .....VKEDAGYVAASL.....KGT-NGDMVTVE.....T-EDGKTL-EM.....KKEL-CEQMNPPKYEKVEDMADLTLNHEPAVLHNLIRY-FEGL  
Asumyo4 .....DAEAGFVAGSI.....KST-KGDMVSVV.....T-SRNGE-TL.....KSEL-VQEMNPPKFEKVEDMADLTLNHEPAVLHNLIRY-SFML  
AqMHCIIb .....DAEAGFVAGSI.....KST-KGDMVSVV.....T-SRNGE-TL.....KSEL-VQEMNPPKFEKVEDMADLTLNHEPAVLHNLIRY-SFML  
Aaesmmmy .....DAEAGFVAGSI.....KST-KGDMVSVV.....T-SRNGE-TL.....KSEL-VQEMNPPKFEKVEDMADLTLNHEPAVLHNLIRY-SFML  
DmeMHCC .....DEKEGYLLGEI.....KAT-KGELVTV.....L-PGGETK-DF.....KKDL-VGQVNPPEKVEDMADLTLNHEPAVLHNLIRY-RARL  
DmeMHCC .....DEKEGYLLGEI.....KAT-KGELVTV.....L-PGGETK-DF.....KKDL-VGQVNPPEKVEDMADLTLNHEPAVLHNLIRY-RARL



Hma\_21579261\_gi221113859refXP\_
AsuMyo4
AqMHCIIb
Aaesmmmy
DmeMHCC
Lpemyosin
LgMHCII3
TAMHCB
Nve\_SBI

-----VKKSKETSTSAIK-----G-----TLDEQVQANPFLLEAFGNAKITRNNNSRRGKFRIRCHFS
-----SQQBAVGVQVPEKPKK-----V-----TLEDQIVQTNFVLEAFGNARTVNNNSRRGKFRIRHFS
-----DKIKITE-----Q-----NLEDQVQANPFLLEAFGNARTVNNNSRRGKFRIRHFG
-----SKKDTEK-----P-----SLEDQVQVQTNFVLEAFGNARTVNNNSRRGKFRIRHFT
-----SKKTDBAAKSK-----G-----SLEDQVQVQTNFVLEAFGNARTVNNNSRRGKFRIRHFG
-----SLAKCKDKKBEKCKDEKK-----G-----TLEDQIVQCNFVLEAFGNARTVNNNSRRGKFRIRHFG
-----MGQKDEBEKCKDEKK-----G-----TLEDQIVQCNFVLEAFGNARTVNNNSRRGKFRIRHFG
-----TGETKSEKK-----Q-----NLEDQIVQANFLMFAFGNAKITRNNNSRRGKFRIRHFG
-----GTSKADBEHKKQITG-----G-----SLEDQVQVQTNFVLEAFGNARTVNNNSRRGKFRIRHFG

Mmu\_MyoX\_gil30507685refNP\_0623
Mmu\_VIIa\_gil15511010refNP\_0326
Mmu\_VIIB\_gil261823963refNP\_1157
Ddi\_0301\_gil166240253refXP\_0017
Ddi\_1951\_gil66823681refXP\_64519
Sce\_9711\_gil6324902refNP\_014971
Sce\_9373\_gil6319290refNP\_009373
Mmu\_MyoVc\_gil124486759refNP\_001
Mmu\_MyoVa\_gil115511052refNP\_034
Mmu\_MyoVb\_gil46399202refNP\_9638
Ddimyo
Sce\_1888\_gil6321812refNP\_011888
Sar\_1270\_SARC\_01270TOSphaerofo
Mbr\_4119\_nullMonosigabrevicoll
Sro\_4749\_PTSG\_04749TOSalpingoe
PpiMHCa
Agu\_8281\_gil340368578refXP\_0033
Cow\_3939\_CAOG\_03939T0Capsaspor
TAMHCA
AsuMyo
Hma\_21673571\_gi221130996refXP\_
Nve\_JGI5820\_jgiNemve1118073jgi
Mmu\_Myo14\_gi29336026refNP\_0822
MmsmMHC11
Mmu\_Myo9\_gil14326446refNP\_0718
MmuMHC10
Lpenn
LgnmMHCII1
Aaesmm
Dme\_zipper\_gil62471805refNP\_001
PpiMHCb1
PpiMHCb2
Mmu\_Myo15\_gil261245016refNP\_001
Mmu\_Myo7B\_gil145864471refNP\_001
MmcMHC7
Mmu\_Myo6\_gil6754774refNP\_034986
Mmu\_Myo3\_gil124486959refNP\_001
Mmu\_Myo3\_gil153792649refNP\_0010
MmskMHC8
Mmu\_Myo2\_gi205830428refNP\_0010
Mmu\_Myo4\_gil67189167refNP\_03498
Mmu\_Myo1\_gil82524274refNP\_10960
Hma\_21579261\_gi221113859refXP\_
AsuMyo4
AqMHCIIb
Aaesmmmy
DmeMHCC
Lpemyosin
LgMHCII3
TAMHCB
Nve\_SBI

410 420 430 440 450 460 470 480 490 500
Q-QGNIQGGRIVDYLLKRNVRQNPGERNYHIFVYALLAG-----LDQGEREFYLL-SLPEYHYLNQSGCTEDKTIIDQES
K-RGATGAKIEQYLLKRSRVCRQAPDERNYHIFVYCMLEGG-----MNEEKKLLGL-GQAADNYLAMGNCITCEGRVDSQE
S-SGVIEGASIEHFLLEKRSVCRQAPDERNYHIFVYCMLEGG-----MSPEEKQMLSL-GMPSYHYLTMGSCSDEGLSDAKD
KIKGTIVGAKLETYLLKRSRVCRQAPDERNYHIFVYQILSGFNNSCCLKNSSNNNKDDESSSSNNNIDDLKSLKCKASDPNFISSCDSIDLVDDSDV
E-MGSIIGAKILTLLKRSRVCRQAPDERNYHIFVYQILSG-----ASBELKELML-KTIBEYSYLNKSGCFIEGVSDDEEH
K-DTSIIGARIRTYLLKRSRVCRQAPDERNYHIFVYQILSG-----LPAQTKELHL-TDADYFYFMNQGDTKINGIDDAKE
E-NTTIRGSKIRTYLLKRSRVCRQAPDERNYHIFVYQILSG-----LPEPVKQELHL-SSPKDYHYTNQGGQPNAGIDDAKE
E-RNQTIGANMRTYLLKRSRVCRQAPDERNYHIFVYQILSG-----AQQSEFKHLKL-GSABEFPYTRMGGNTVIEGVNDRAD
K-RYRIIGANMRTYLLKRSRVCRQAPDERNYHIFVYQILSG-----AKLPEFKMLRL-GNADSPHYTKGQSPMIEGVDDAKE
K-KYHIIGANMRTYLLKRSRVCRQAPDERNYHIFVYQILSG-----ASLPEFKELAL-TCAEDFFYTAGGNTVIEGVNDADD
N-AGFISGASIQSYLLKRSRVCRQAPDERNYHIFVYQILSG-----ATAEKKALHL-AGPSPFNYSQGVYIKGVSDSE
E-HGMINGAHIEYLLKRSRVCRQAPDERNYHIFVYQILSG-----LDDSELKRLKRSRVCRQAPDERNYHIFVYQILSG
R-SGLISGANIEYLLKRSRVCRQAPDERNYHIFVYQILSG-----ATPEMRQELLL-DSVDVAVFLSDKSSDIEGVDDVAE
A-AGVIGATIDTYLLKRSRVCRQAPDERNYHIFVYQILSG-----ADTALITDFGL-QDIKSYRFMSN-GDVTLRIDDDKKE
A-AGFIIGATIDTYLLKRSRVCRQAPDERNYHIFVYQILSG-----ADAKYSELLE-EDISKYEFISN-GDMHLHHVDDGKE
V-SGYISGANIEYLLKRSRVCRQAPDERNYHIFVYQILSG-----ATKEMKPKLL-EDANDYGFISN-GHESIAGQDDAQD
S-SGHIIAGANIDTYLLKRSRVCRQAPDERNYHIFVYQILSG-----MDPKKEKFFY-HSFKYKFLSN-GNLVAGINDVQKE
K-TGHISGGNIEYLLKRSRVCRQAPDERNYHIFVYQILSG-----ASKDQARDLLL-EDKIDKYNVMSN-GKTVGMDVVAE
A-AGFIVGANIEYLLKRSRVCRQAPDERNYHIFVYQILSG-----ATPEMKDPLL-EDKIDKYNVMSN-QLVVPVGDVAE
M-SGYISGANIEYLLKRSRVCRQAPDERNYHIFVYQILSG-----TSPIEKANFLL-EKIDKYNVMSN-GYICLPNVDDATE
N-SGFISGANIEYLLKRSRVCRQAPDERNYHIFVYQILSG-----ASPEVKKQPLL-LDPKSYFMNS-GLVQLPMDRAE
A-SGFISGANIEYLLKRSRVCRQAPDERNYHIFVYQILSG-----LEAKERGELL-KPDIYRFLSN-GMVPVGDVAE
I-AGYIVGANIEYLLKRSRVCRQAPDERNYHIFVYQILSG-----AGEQLKADLLL-EPCSHYRFLTN-GPSSPAQ-QEREL
V-TGYIVGANIEYLLKRSRVCRQAPDERNYHIFVYQILSG-----AKEMKSDLLL-ESFNSYTFILSN-GPVPVGDVDDM
V-NGYIVGANIEYLLKRSRVCRQAPDERNYHIFVYQILSG-----AGEHLKDLLL-EPYKRYRFLSN-GHVTIPQDDKDM
V-TGYIVGANIEYLLKRSRVCRQAPDERNYHIFVYQILSG-----AGEHLKSDLLL-ESFNSYTFILSN-GYIPIPGQDDKN
M-SGYICGANIEYLLKRSRVCRQAPDERNYHIFVYQILSG-----ASTEQKNDPLL-EDAKSYFMNS-GPMPVGDVVAE
L-SGYISGANIEYLLKRSRVCRQAPDERNYHIFVYQILSG-----ATPAQRKPLL-EDMSYRFLSN-GMVPVGDVVAE
A-SGYISGANIEYLLKRSRVCRQAPDERNYHIFVYQILSG-----ASPEQHKFLL-DDITKTYRFLSN-GSLVAVDDHIE
A-SGFISGANIEYLLKRSRVCRQAPDERNYHIFVYQILSG-----ATPEQRKPLL-DDVSYRFLSN-GSLVAVDDVAE
R-DSKLASADIEYLLKRSRVCRQAPDERNYHIFVYQILSG-----LPDQVLTLLMDLDDKPNYKFLTN-GDVVPSQDDVEL
-----
A-RGTLSPADIQYLLKRSRVCRQAPDERNYHIFVYQILSG-----NQELRNMLLV-STNPSDFHICSC-GVVAVESLDDAKE
P-TGKLASADIDSYLLKRSRVCRQAPDERNYHIFVYQILSG-----KPELQDMLLL-SMNPDYHFCSC-GVTVDMDDGEE
A-TGKLASADIEYLLKRSRVCRQAPDERNYHIFVYQILSG-----KPELQDMLLI-TNMPDYAFISQ-GETTVASIDDEE
A-TGKLASADIEYLLKRSRVCRQAPDERNYHIFVYQILSG-----KPELQDMLLV-TNMPDYAFISQ-GEVSVASIDDEE
A-TGKLASADIEYLLKRSRVCRQAPDERNYHIFVYQILSG-----KPELIDLLLI-STNPDFFPFYSQ-GEVTVASIDDEE
T-TGKLASADIEYLLKRSRVCRQAPDERNYHIFVYQILSG-----KPELIELLLI-TNMPDYAFISQ-GEVTVASIDDEE
T-TGKLASADIEYLLKRSRVCRQAPDERNYHIFVYQILSG-----KPELIELLLI-TNMPDYAFISQ-GEVTVASIDDEE
T-TGKLASADIEYLLKRSRVCRQAPDERNYHIFVYQILSG-----KPELIELLLI-TNMPDYAFISQ-GEVTVASIDDEE
T-TGKLASADIEYLLKRSRVCRQAPDERNYHIFVYQILSG-----KPELIELLLI-TNMPDYAFISQ-GEVTVASIDDEE
Q-QKLAGADIEYLLKRSRVCRQAPDERNYHIFVYQILSG-----TDDDFYKLCIPRKAADYEFELNK-GVPSVEIDDDRE
K-KKVASCDIEYLLKRSRVCRQAPDERNYHIFVYQILSG-----FNTEKLDLLL-DSDVAVFLSDKSSDIEGVDDVAE
N-QKISGADIEYLLKRSRVCRQAPDERNYHIFVYQILSG-----APQKLLDLLL-NRQVKDYAFIAPL-GCVSVDDVDDAM
A-SGKLASADIEYLLKRSRVCRQAPDERNYHIFVYQILSG-----SVKGLKMDLL-SNDIYDYNVAQ-GKVTIPVDDGEE
P-TGKLASADIEYLLKRSRVCRQAPDERNYHIFVYQILSG-----SVPQKVICLL-TDNIYDYHIVSQ-GKVTASIDDEE
T-QKISGADIEYLLKRSRVCRQAPDERNYHIFVYQILSG-----APPENIEKILA-VDPDGLYGFQIN-GTLTVGIDDEE
T-QKISGADIEYLLKRSRVCRQAPDERNYHIFVYQILSG-----AIPAYHEKLLV-SPDPALYFYSQ-GCLVTSIDDTQE
L-HGKLASADIEYLLKRSRVCRQAPDERNYHIFVYQILSG-----ADDQMKKYLIV-TGKPEBDYKFLSE-GVARDVADDEE
P-QKLAGADIEYLLKRSRVCRQAPDERNYHIFVYQILSG-----APKDLHDLLESNKTDAYATYAK-GEERADGIDDDVE

Mmu\_MyoX\_gil30507685refNP\_0623
Mmu\_VIIa\_gil15511010refNP\_0326
Mmu\_VIIB\_gil261823963refNP\_1157
Ddi\_0301\_gil166240253refXP\_0017
Ddi\_1951\_gil66823681refXP\_64519
Sce\_9711\_gil6324902refNP\_014971
Sce\_9373\_gil6319290refNP\_009373
Mmu\_MyoVc\_gil124486759refNP\_001
Mmu\_MyoVa\_gil115511052refNP\_034
Mmu\_MyoVb\_gil46399202refNP\_9638
Ddimyo
Sce\_1888\_gil6321812refNP\_011888
Sar\_1270\_SARC\_01270TOSphaerofo
Mbr\_4119\_nullMonosigabrevicoll
Sro\_4749\_PTSG\_04749TOSalpingoe
PpiMHCa
Agu\_8281\_gil340368578refXP\_0033
Cow\_3939\_CAOG\_03939T0Capsaspor
TAMHCA
AsuMyo
Hma\_21673571\_gi221130996refXP\_
Nve\_JGI5820\_jgiNemve1118073jgi
Mmu\_Myo14\_gi29336026refNP\_0822
MmsmMHC11
Mmu\_Myo9\_gil14326446refNP\_0718
MmuMHC10
Lpenn
LgnmMHCII1
Aaesmm
Dme\_zipper\_gil62471805refNP\_001
PpiMHCb1
PpiMHCb2
Mmu\_Myo15\_gil261245016refNP\_001
Mmu\_Myo7B\_gil145864471refNP\_001
MmcMHC7
Mmu\_Myo6\_gil6754774refNP\_034986
Mmu\_Myo3\_gil124486959refNP\_001
Mmu\_Myo3\_gil153792649refNP\_0010
MmskMHC8
Mmu\_Myo2\_gi205830428refNP\_0010
Mmu\_Myo4\_gil67189167refNP\_03498
Mmu\_Myo1\_gil82524274refNP\_10960
Hma\_21579261\_gi221113859refXP\_
AsuMyo4
AqMHCIIb
Aaesmmmy
DmeMHCC
Lpemyosin
LgMHCII3
TAMHCB
Nve\_SBI

510 520 530 540 550 560 570 580 590 600
RQVITAMVEMVQPSKBEVREVLRLAGLILGNIEEFTI-----AGGAQIP-----FKTALGRSADLLGL-DPTQLTDATQSRMILRG
YANTRSAMKVLMTDTEENWEISKLLAAILHMGNGLYEARTFEN-LDAQEVL-----FSPSLATAASLILEV-NPPDLMSCLTSTRILITRG
YAHVRSAMKIQFSDSEENWDSKLLAAILHMGNGLYEARTFEN-LDSSDVM-----ETPAPFLAMKLLGV-QQALRDLCLIKTIVPLVG
PIKTEALAKVMGLSNDLELIGYIKLISLHIGNIEFEK-----GK-EDSSIIKYGNSSPGESFSDDDAGGYNPLETSCKLLGC-SVDSLKSTPCSRKMKAGN
FNKTCCHAMQVAGITLVGQVNRVFRILSAILLIGNIEFEK-----DSDCQLI-----DRDPLEKVSALLGCAQDDELLNSMLTKRVIITK
YKIVDAILVLGVTIQHQVQVNRVFRILSAILLIGNIEFEK-----TRN-DASLSA-----DEPNLKLKLLGLI-DAYNFYFYSQ-GEVTVASIDDEE
YKIVDAILVLGVTIQHQVQVNRVFRILSAILLIGNIEFEK-----TRN-DASLSA-----EQNLQIACBLGLI-DFPFAKWLIVKQIVTSS
MVETQKTFLLGFKQVMDQVNRVFRILSAILLIGNIEFEK-----VGN-ERSVSE-----DSSHVKVFCBLLGLI-ETSKVAQVAVFYSQ-GEVTVASIDDEE
MAHTROACTLLGISYQMGIFRILAGLILGNVGFAS-----RDS-DSCTIPP-----KHPLTIFCDLMGV-DVEEMCHLCKRKLATAT
FEKTRQALLLGVDRSHQISIFKILIASLHILGNSVBIQS-----ERDGDSCSISP-----QDEHLSNFCSLGLI-EHLSQVILKRLKLVITSS
FKITRQAMDIVGFSQEQMSIFKILIASLHILGNSVBIQS-----GA-GEQAVLK-----DKTALNAASTVFG-NPSVLEKALMEPRILAGR
FKELLSALNIIQFSDKQIRWVQVVAIILLIGNIEFVS-----DR-AEQASFK-----NDVSAICSNLGV-DEKDFQTAILRFRSKAGK
FAITTEAMRVVGVINDADQTEVWRVLSGVMKLGQMKFTQ-----DR-SDQAMP-----DDTIAAMVCKLGLI-PLSDFTKAMKFRIVKGR
FKQTNBAFQIMGMSDEINDVWRVLSGVMKLGQMKFTQ-----GRRGDQASIT-----SDVCSQRCLSLGLI-NHNDPFRKSMTRFRVAKGR
FADTNEACRIMGMDDEQIMDWRVLSGVMKLGQMKFTQ-----QRRGQAVIK-----DSSVQVCKLGLI-NVDFTRSLKPKVAGH
FLDTLEALEIMLATPEEIEAILRIISSCLLFGNVKVKQ-----ERN-SDQAALL-----NNTVTQKICKLGLM-PAVDFEAKLLKFRIVKGR
YDDTVEAMNVGISEEKSAVFRVLSGVMKLGQMKFTQ-----ERN-SDQALLV-----DNTVAQIKLGLI-PVTDFTRSLKPKVAGH
FKNTIYAMNVFISEAEQAMFRIVLSGVMKLGQMKFTQ-----EKR-SDQAILN-----DDTYAQKACVLLGLI-PLGEPFRSLKFRIVKGR
FQNTLNAIYAVGINSDDNSLKLSSLLHGNLQVDE-----DKS-SDQATLP-----DNTVAQKVCBLLGLI-SVTDFTRALLKFRIVKGR
PHNTIRSMKIMGPHDEEITSVLRVLSGVMKLGQMKFTQ-----EKK-SDQAALL-----DDRVAQKLCBLLGLI-PLVDFEAKLLKFRIVKGR
FKLTLAEMRDGQIIEELNPFKVLVSCALLFGNLDPKM-----ERN-SDQAALL-----DNTISQIISHLGLI-AVDFTWALLKFRIVKGR
LADSIVSLHYF-FFYIYFSATYRVVLSGVMKLGQMKFTQ-----ERN-SDQAALL-----NNEVAQIKLGLI-NVDFTRSLKPKVAGH
FQETLESRLVGLLPEETAMLRVLSGVMKLGQMKFTQ-----ERN-TDQATMP-----DNTAAQKLCBLLGLI-GVDFRSLKFRIVKGR
FQETLEAMSIMGFNBEELAILKVVSVLQGNVTFPK-----ERN-TDQASMP-----DNTAAQKVCBLLGLI-NVDFTRSLKFRIVKGR
FQETMEAMRIMGFPEDEQMLLRVLSGVMKLGQMKFTQ-----ERN-TDQASMP-----DNTAAQKVCBLLGLI-NVDFTRSLKFRIVKGR
FQETMEAMRIMGFPEDEQMLLRVLSGVMKLGQMKFTQ-----ERN-TDQASMP-----DNTVAQKVCBLLGLI-NVDFTRSLKFRIVKGR
FKQTHEAMLVGMSDDVNGFRVLSGVMKLGQMKFTQ-----ERN-SDQATLP-----DNTVAQKVCBLLGLI-NVDFTRSLKFRIVKGR
FQSLAESMGIMGISTDDQSAIIRVLSGVMKLGQMKFTQ-----ERS-SDQATLP-----DNTVAQKVCBLLGLI-PVTAVTQAPLCKFRIVKGR
FOATVKSMMIMGITDEEENFIRVLSGVMKLGQMKFTQ-----ERS-SDQATLP-----DNTVAQKVCBLLGLI-SVTDMKAPLFRIVKGR
FOATVKSMMIMGITDEEENFIRVLSGVMKLGQMKFTQ-----ERN-NDQATLP-----DNTVAQKVCBLLGLI-SVTDMKAPLFRIVKGR
WKENEAMVILNFTDEEKESILKMLCGCLLFGNINLQ-----NKR-DEGCEVD-----NPVMEKAAALFQI-PAADFPMKCLLFRIVKGR
-----
FLATEKAIDVGLGFLPDEKFGCYLVGAMHFGNLFKFR-----NLR-BEQLEAD-----GTENADKAAFLMGI-HASELLKGLIYPRIVKGN
LIATDHAMDILGFSVDEKACYKIVGALLHFGNMFKQ-----KOR-BEQAEAD-----GTESADKAAFLMGI-SGDLKGLIYPRIVKGN
LMATDSAFDLVGFPTPEEKNSYKLTGAMHFGNMFKQ-----KOR-BEQAEAD-----GTEDADKAAFLMGI-NSADLLKGLIYPRIVKGN
LLATDSAFDLVGFPTPEEKNSYKLTGAMHFGNMFKQ-----KOR-BEQAEAD-----GTEDADKAAFLMGI-NSADLLKGLIYPRIVKGN
LLATDSAFDLVGFPTPEEKNSYKLTGAMHFGNMFKQ-----KOR-BEQAEAD-----GTEDADKAAFLMGI-NSAEMLKGLIYPRIVKGN





LgmnMHCII1 .....DTMFGSRTRK--GM----FR-TVSQLYKEQLSKL
Aaesmm .....DTQFGARTRK--GM----FR-TVSHLYKEQLAKL
Dme\_zipper\_gi62471805refNP\_001 .....DTQFGARTRK--GM----FR-TVSHLYKEQLAKL
PpiMHCb1 .....CVPAGPKERK--KT----FQ-TMAMMKKSLNEL
PpiMHCb2 .....
Mmu\_Myo15\_gi261245016refNP\_001 .....-QFGEKTHKKG--TS----FH-LITSLHKENINKL
Mmu\_Myo7B\_gi145864471refNP\_001 .....-GVKE-KRKA--AS----FQ-TVSQLHKEINKL
MmcMHC7 .....-DKGKGKAKKG--SS----FQ-TVSALHRENINKL
Mmu\_Myo6\_gi6754774refNP\_034986 .....-GKGKGGKKG--SS----FQ-TVSALHRENINKL
Mmu\_Myo13\_gi124486959refNP\_001 .....-GKKGKKGKKG--SS----FQ-TVSALHRENINKL
Mmu\_Myo3\_gi153792649refNP\_0010 .....-GKKGKKGKKG--SS----FQ-TVSALHRENINKL
MmskMHC8 .....-GAKKGAKKKG--SS----FQ-TVSALHRENINKL
Mmu\_Myo2\_gi205830428refNP\_0010 .....-AAKKGAKKKG--SS----FQ-TVSALHRENINKL
Mmu\_Myo4\_gi67189167refNP\_03498 .....-GKKGKKGKKG--SS----FQ-TVSALHRENINKL
Mmu\_Myo1\_gi82524274refNP\_10960 .....-GKKGKKGKKG--SS----FQ-TVSALHRENINKL
Hma\_21579261\_gi221113859refXP\_ .....LEGRICRKGPPSRMNFQDFKLSYAGSVGVSEBGLKNDPINDHTASLFSHATDPLVSLLFQYDFDPACRRKK--SA----FQ-TVSPRHKEQLKVL
Asumyo4 .....-KEGGGKKGKSGS--FM-TVSMLYRESLNNL
AqMHCIIb .....-ESEKSRKRG--SQ----FQ-TVQIHKTSLNNL
Aaesmmmy .....-AKGGGRKKG--AA----FA-TVSSAYKEQLNNL
DmeMHCC .....-QAKGGRKKG--GG----FA-TVSSAYKEQLNNL
Lpemosin .....-LTPGGKKGKSA--FQ-TISSAYKEQLNNL
LgMHCII3 .....-GGPAKKGK--SA----FQ-TISATHRESLNNL
TaMHCb .....-HQPEGRKKG--SQ----FL-TVSQLHKEQLKVL
Nve\_SB1 .....-ATEGHRKKG--GS----FQ-TVSAKHKEQLQSL

1010 1020 1030 1040 1050 1060 1070 1080 1090 1100
Mmu\_MyoX\_gi130507685refNP\_0623 MATLSSSNPFVRCIKPNTQKMPDQDQVVVNLQRLYSGLMLETVRIRKAGYVRRPFDQFYKRYK--VLMRNLALP
Mmu\_VIIa\_gi115511010refNP\_0326 MRLTLAGCQPFVRCIKPNEFKKPMFLDRHLQVLRYSGLMLETVRIRKAGYVRRPFDQFYKRYK--VLLPQVVPAYKQ
Mmu\_VIIb\_gi261823963refNP\_1157 MRLLTICQPFVRCIKPNEFKKPMFLDRHLQVLRYSGLMLETVRIRKAGYVRRPFDQFYKRYK--VLLPQVVPAYKQ
Ddi\_0301\_gi166240253refXP\_0017 MTTLNSTNPHVRCIKPNEFKKPMFLDRHLQVLRYSGLMLETVRIRKAGYVRRPFDQFYKRYK--LIVAKDFKNDSDSNEKSWNSILKEDTLNNSNG
Ddi\_1951\_gi66823681refXP\_64519 MKTISRTTPHVRCIKPNEFKKPMFLDRHLQVLRYSGLMLETVRIRKAGYVRRPFDQFYKRYK--ILYVKDNTGSGGK--KG
Sce\_9711\_gi6324902refNP\_014971 MTLNNTNPHVRCIKPNEFKKPMFLDRHLQVLRYSGLMLETVRIRKAGYVRRPFDQFYKRYK--ILIPHEQWDLIFKFK
Sce\_9373\_gi6319290refNP\_009373 MALINSTNPHVRCIKPNEFKKPMFLDRHLQVLRYSGLMLETVRIRKAGYVRRPFDQFYKRYK--LTDYSLWPSGLYLN
Mmu\_MyoVc\_gi124486759refNP\_001 METLNATTPHVRCIKPNEFKKPMFLDRHLQVLRYSGLMLETVRIRKAGYVRRPFDQFYKRYK--ILMTQQLSLE
Mmu\_MyoVa\_gi115511052refNP\_034 MTLNATTPHVRCIKPNEFKKPMFLDRHLQVLRYSGLMLETVRIRKAGYVRRPFDQFYKRYK--VLMKQKDLVLG
Mmu\_MyoVb\_gi46399202refNP\_9638 METLNATTPHVRCIKPNEFKKPMFLDRHLQVLRYSGLMLETVRIRKAGYVRRPFDQFYKRYK--VLMKQKDLVLG
Ddimyo .....
Sce\_1888\_gi6321812refNP\_011888 MATLETTPHVRCIKPNEFKKPMFLDRHLQVLRYSGLMLETVRIRKAGYVRRPFDQFYKRYK--LLAPNVRDA
Sar\_1270\_SARC\_01270T0Sphaerofo MTLNNTNPHVRCIKPNEFKKPMFLDRHLQVLRYSGLMLETVRIRKAGYVRRPFDQFYKRYK--ILYVNTTITTFSSK
Mbr\_4119\_nullMonosigabrevicol1 MDLTHHTVPHVRCIKPNEFKKPMFLDRHLQVLRYSGLMLETVRIRKAGYVRRPFDQFYKRYK--ILTPDAVPGG-F
Sro\_4749\_PTSG\_04749T0Salpingoe MDLTHHTVPHVRCIKPNEFKKPMFLDRHLQVLRYSGLMLETVRIRKAGYVRRPFDQFYKRYK--ILVPEAIPRG-F
PpiMHCa .....
Agu\_8281\_gi340368578refXP\_0033 MTLRQTHPHVRCIKPNEFKKPMFLDRHLQVLRYSGLMLETVRIRKAGYVRRPFDQFYKRYK--ILTPGAIIPKG-F
Cow\_3939\_CAOG\_03939T0Capsaspor MTLRNTQPHVRCIKPNEFKKPMFLDRHLQVLRYSGLMLETVRIRKAGYVRRPFDQFYKRYK--ILTPSAVPGG-F
TaMHCa .....
Asumyo .....
Hma\_21673571\_gi221130996refXP\_ MTLRNTNPHVRCIKPNEFKKPMFLDRHLQVLRYSGLMLETVRIRKAGYVRRPFDQFYKRYK--ILTPNVIIPKG-F
Nve\_JGI5820\_jgiNemve1118073jgi MTLRNTNPHVRCIKPNEFKKPMFLDRHLQVLRYSGLMLETVRIRKAGYVRRPFDQFYKRYK--ILCPGVVPGG-F
Mmu\_Myo14\_gi29336026refNP\_0822 MTLRNTNPHVRCIKPNEFKKPMFLDRHLQVLRYSGLMLETVRIRKAGYVRRPFDQFYKRYK--LTPGAIIPKG-F
MmskMHC11 .....
Mmu\_Myo9\_gi114326446refNP\_0718 MATLRNTNPHVRCIKPNEFKKPMFLDRHLQVLRYSGLMLETVRIRKAGYVRRPFDQFYKRYK--ILTPNVIIPKG-F
Mmu\_MHC10 .....
Mmu\_Myo10\_gi114326446refNP\_0718 MATLRNTNPHVRCIKPNEFKKPMFLDRHLQVLRYSGLMLETVRIRKAGYVRRPFDQFYKRYK--ILTPNVIIPKG-F
Lpenn .....
LgmnMHCII1 .....
Aaesmm .....
Dme\_zipper\_gi62471805refNP\_001 MDLTRNTNPHVRCIKPNEFKKPMFLDRHLQVLRYSGLMLETVRIRKAGYVRRPFDQFYKRYK--LTPGAIIPKG-F
PpiMHCb1 .....
PpiMHCb2 .....
Mmu\_Myo15\_gi261245016refNP\_001 MTLDKSTAPHVRCIKPNEFKKPMFLDRHLQVLRYSGLMLETVRIRKAGYVRRPFDQFYKRYK--ILNPRIFKSKSF
Mmu\_Myo7B\_gi145864471refNP\_001 MTLNLRATQPHVRCIKPNEFKKPMFLDRHLQVLRYSGLMLETVRIRKAGYVRRPFDQFYKRYK--ILNPSAIPDQF
MmcMHC7 .....
Mmu\_Myo6\_gi6754774refNP\_034986 MTLNLRATQPHVRCIKPNEFKKPMFLDRHLQVLRYSGLMLETVRIRKAGYVRRPFDQFYKRYK--ILNPSAIPDQF
Mmu\_Myo13\_gi124486959refNP\_001 MTLNLRATQPHVRCIKPNEFKKPMFLDRHLQVLRYSGLMLETVRIRKAGYVRRPFDQFYKRYK--ILNPSAIPDQF
Mmu\_Myo3\_gi153792649refNP\_0010 MTLNLRATQPHVRCIKPNEFKKPMFLDRHLQVLRYSGLMLETVRIRKAGYVRRPFDQFYKRYK--VLNASAIPEQF
MmskMHC8 .....
Mmu\_Myo2\_gi205830428refNP\_0010 MTLNLRATQPHVRCIKPNEFKKPMFLDRHLQVLRYSGLMLETVRIRKAGYVRRPFDQFYKRYK--VLNASAIPEQF
Mmu\_Myo4\_gi67189167refNP\_03498 MTLNLRATQPHVRCIKPNEFKKPMFLDRHLQVLRYSGLMLETVRIRKAGYVRRPFDQFYKRYK--VLNASAIPEQF
Mmu\_Myo1\_gi82524274refNP\_10960 MTLNLRATQPHVRCIKPNEFKKPMFLDRHLQVLRYSGLMLETVRIRKAGYVRRPFDQFYKRYK--VLNASAIPEQF
Hma\_21579261\_gi221113859refXP\_ LTLRNTNPHVRCIKPNEFKKPMFLDRHLQVLRYSGLMLETVRIRKAGYVRRPFDQFYKRYK--YQILASNAITPPG-F
Asumyo4 .....
AqMHCIIb .....
Aaesmmmy .....
DmeMHCC .....
Lpemosin .....
LgMHCII3 .....
TaMHCb .....
Nve\_SB1 .....
MDLTYSTSPHVRCIKPNEFKKPMFLDRHLQVLRYSGLMLETVRIRKAGYVRRPFDQFYKRYK--ILAPTAV-SQG

1110 1120 1130 1140 1150 1160 1170 1180 1190 1200
Mmu\_MyoX\_gi130507685refNP\_0623 .....DDIRKCTVLLQVY--DASNSWQLGKTKVFLRESLEQLEKRRBEEDRAAMVIRAHILGYLARKQYR
Mmu\_VIIa\_gi115511010refNP\_0326 .....GDLRGTQORMAEAV--LSTHDDWQIGKTKIFLKHDMLEVERDKATIDRIVILLQKVRGFKDRSNFLR
Mmu\_VIIb\_gi261823963refNP\_1157 .....NKFRQMTLHAIADKL--LSTDKDWVQKTKIFLKHDMLEVERDKATIDRIVILLQKVRGFKDRSNFLR
Ddi\_0301\_gi166240253refXP\_0017 GTNNQITELKRRKGAELMINKL--SIDSSVQLGKTKIFLKHDMLEVERDKATIDRIVILLQKVRGFKDRSNFLR
Ddi\_1951\_gi66823681refXP\_64519 SNNKIKDKPKILVQNLITGI--ELSDDKKIKGKTKVFLRESLEQLEKRRBEEDRAAMVIRAHILGYLARKQYR
Sce\_9711\_gi6324902refNP\_014971 .....ETTBEDIIISVVKMILDAT--VSKSKYQIGNTKIFPKAGMLAYLEKLRNKNMHSIVMIQKIRAKYRKYQLQ
Sce\_9373\_gi6319290refNP\_009373 .....DLPEKATVNFQSLDADT--ISDSAKYQIGNTKIFPKAGMLAYLEKLRNKNMHSIVMIQKIRAKYRKYQLQ
Mmu\_MyoVc\_gi124486759refNP\_001 .....SDKKVCKVVLHRL--IQDSNQYQGRTKIFFRAGQVAVLEKLRADLRAACDITMIQKIRAKYRKYQLQ
Mmu\_MyoVa\_gi115511052refNP\_034 .....DRKQTKCNVLEKL--ILDKDYVQGRTKIFFRAGQVAVLEKLRADLRAACDITMIQKIRAKYRKYQLQ
Mmu\_MyoVb\_gi46399202refNP\_9638 .....TDKKNICKSVLESL--IKDPDKFQGRTKIFFRAGQVAVLEKLRADLRAACDITMIQKIRAKYRKYQLQ
Ddimyo .....
Sce\_1888\_gi6321812refNP\_011888 .....EDSQKATDAVLKHL--LIDPEKATVNFQSLDADT--ISDSAKYQIGNTKIFPKAGMLAYLEKLRNKNMHSIVMIQKIRAKYRKYQLQ
Sar\_1270\_SARC\_01270T0Sphaerofo .....LKAISTQKQCEFLITLS--QLDQKVKYIGNTKIFFRAGQVAVLEKLRADLRAACDITMIQKIRAKYRKYQLQ
Mbr\_4119\_nullMonosigabrevicol1 .....MDGRKACEKMEAL--ELSDDKKIKGKTKVFLRESLEQLEKRRBEEDRAAMVIRAHILGYLARKQYR
Sro\_4749\_PTSG\_04749T0Salpingoe .....TEGRACERMLEAL--NLDPSNYVGLTKVFRAGVLAHLEBERDILSKMIVGLQAHCRGYLARRHGALLHGSNAILVITQRNARVMKL
PpiMHCa .....
Agu\_8281\_gi340368578refXP\_0033 .....TDGRHACEKMEAL--NLDPSNYVGLTKVFRAGVLAHLEBERDILSKMIVGLQAHCRGYLARRHGALLHGSNAILVITQRNARVMKL
Cow\_3939\_CAOG\_03939T0Capsaspor .....MDGRKAAATAMLSQL--DLDQRYLRIGSKIFFRAGVLAHLEBERDILSKMIVGLQAHCRGYLARRHGALLHGSNAILVITQRNARVMKL
TaMHCa .....
Asumyo .....
Hma\_21673571\_gi221130996refXP\_ .....MDGKAAEKMLIAL--ELDKATYRIGSKIFFRAGVLAHLEBERDILSKMIVGLQAHCRGYLARRHGALLHGSNAILVITQRNARVMKL
Nve\_JGI5820\_jgiNemve1118073jgi .....MDNKKIQKMEAL--ELDANSYRIGSKIFFRAGVLAHLEBERDILSKMIVGLQAHCRGYLARRHGALLHGSNAILVITQRNARVMKL
Mmu\_Myo14\_gi29336026refNP\_0822 .....MDARKAVQKMTAVL--ELDANSYRIGSKIFFRAGVLAHLEBERDILSKMIVGLQAHCRGYLARRHGALLHGSNAILVITQRNARVMKL
MmskMHC11 .....
Mmu\_Myo9\_gi114326446refNP\_0718 .....MDGKAVRKMIDAL--ELDANSYRIGSKIFFRAGVLAHLEBERDILSKMIVGLQAHCRGYLARRHGALLHGSNAILVITQRNARVMKL
Mmu\_MHC10 .....
Mmu\_Myo10\_gi114326446refNP\_0718 .....MDGRNASKMIEAL--EMDPNLFRIQSKIFFRAGVLAHLEBERDILSKMIVGLQAHCRGYLARRHGALLHGSNAILVITQRNARVMKL
Lpenn .....
LgmnMHCII1 .....
Aaesmm .....
DmeMHCC .....
Lpemosin .....
LgMHCII3 .....
TaMHCb .....
Nve\_SB1 .....
MDGRNASKMIEAL--EMDPNLFRIQSKIFFRAGVLAHLEBERDILSKMIVGLQAHCRGYLARRHGALLHGSNAILVITQRNARVMKL















```
Mmu_Myo1_gi82524274refNP_10960 -----SEE-----
Hma_21579261_gi221113859refXP_ --PGRARSRMTPQHDD--
Asumyo4 --GGLVLSQSTSAVSRSGSTRPRTTSFVDY--
AqMHCI1b --KDDDEDD--
Aaesnmmy --GSPALSTV--
DneMHCC --ASPAPRATSVRPQFDGLAFPPFDLAPENEF--
Lpemyosin --TSPM--
LgMHCI13 --STSVTRTSVVRMS--
TaMHCB --LYCYCMVLFHPLSVTKSPIL--
Nve_SB1 -----
```
